# Supplementary material
Source: MDPI journal article supplement (https://www.mdpi.com/2311-5629/5/3/35)
Supplement: s1 [file s1]

## Supplementary Information

### A Simple Two-Step Process for Producing Strong and Aligned Carbon Nanotube-Polymer Composites

Seyram Gbordzoe <sup>1</sup>, Paa Kwasi Adusei <sup>1</sup>, Devika Chauhan <sup>2</sup>, Noe T. Alvarez <sup>3</sup>, Mark R. Haase <sup>4</sup>, Karim Mansari <sup>4</sup>, Sathya N. Kanakaraj <sup>1</sup>, Yu-Yun Hsieh <sup>1</sup> and Vesselin Shanov <sup>1,4,\*</sup>

<sup>1</sup> Department of Mechanical and Materials Engineering, University of Cincinnati, Cincinnati, OH 45221-0072, USA; gbordzsm@mail.uc.edu (S.G.); aduseipi@mail.uc.edu (P.K.A.); kanakasa@mail.uc.edu (S.N.K.); hsiehyu@mail.uc.edu (Y.-Y.H.)

<sup>2</sup> Department of Aerospace Engineering and Engineering Mechanics, University of Cincinnati, OH 45221-0070, USA; chauhadk@mail.uc.edu

<sup>3</sup> Department of Chemistry, University of Cincinnati, OH 45221-0012, USA; alvarene@ucmail.uc.edu

<sup>4</sup> Department of Chemical and Environmental Engineering, University of Cincinnati, OH 45221-0012, USA; haasemr@mail.uc.edu (M.R.H.); manserkm@mail.uc.edu (K.M.)

\* Correspondence: vesselin.shanov@uc.edu; Tel: +1-513-556-2461

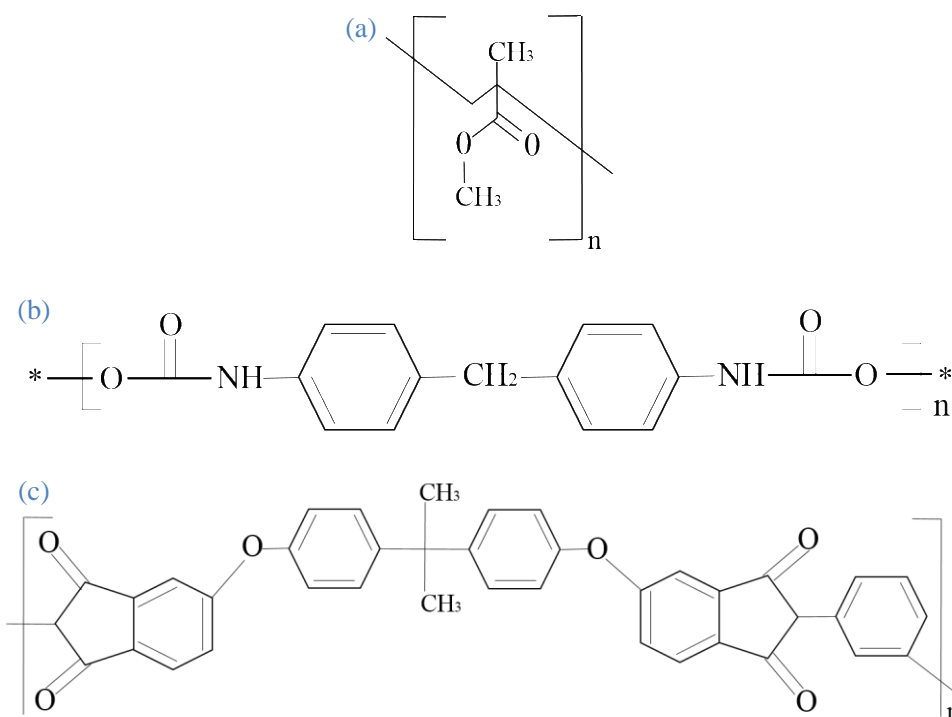

**Figure 1.** Typical chemical structure of: (a) PMMA; (b) TPU and (c) Ultem™ 1000 thermoplastic polymers.



**Table 1.** Relevant physical properties of different polymers used for fabricating CNT-polymer composites.

| Polymer    | Supplier   | Tensile strength (MPa) | Tensile Modulus (MPa) | Melting point (°C) | Glass Transition (°C) |
|------------|------------|------------------------|-----------------------|--------------------|-----------------------|
| TPU        | Ninjatek   | 26                     | 12                    | 216                | -35                   |
| Ultem 1000 | Sabic      | 110                    | 3580                  | 204-232            | 217                   |
| PMMA       | Alfa Aesar | 47-79                  | 2200-3800             | 150                | 100-105               |

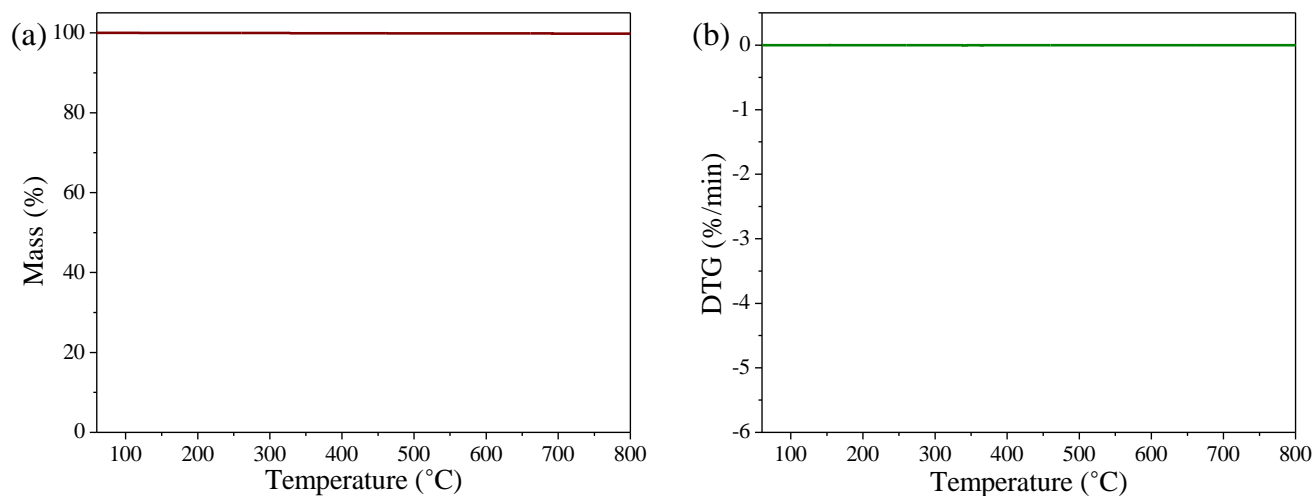**Figure S2.** (a) TGA and (b) DTG plots of CNT sheet densified with NMP and dried in a vacuum oven. Little or no thermal degradation was observed within the temperature range considered in this paper.
